# Supplementary material for: Use of Next Generation Sequencing to study two cowpox virus outbreaks
Source: PubMed Central journal article supplement (PMC6398431; doi:10.7717/peerj.6561), 2019-03-01

Supplemental Data:

Maximum-Parsimony Dendrogram of aligned and identified HA-gene-genotypes of orthopoxviruses. Label of genotypes correspond to Suppl\_Data 1. Branch lengths show nucleotide differences between the investigated strains.

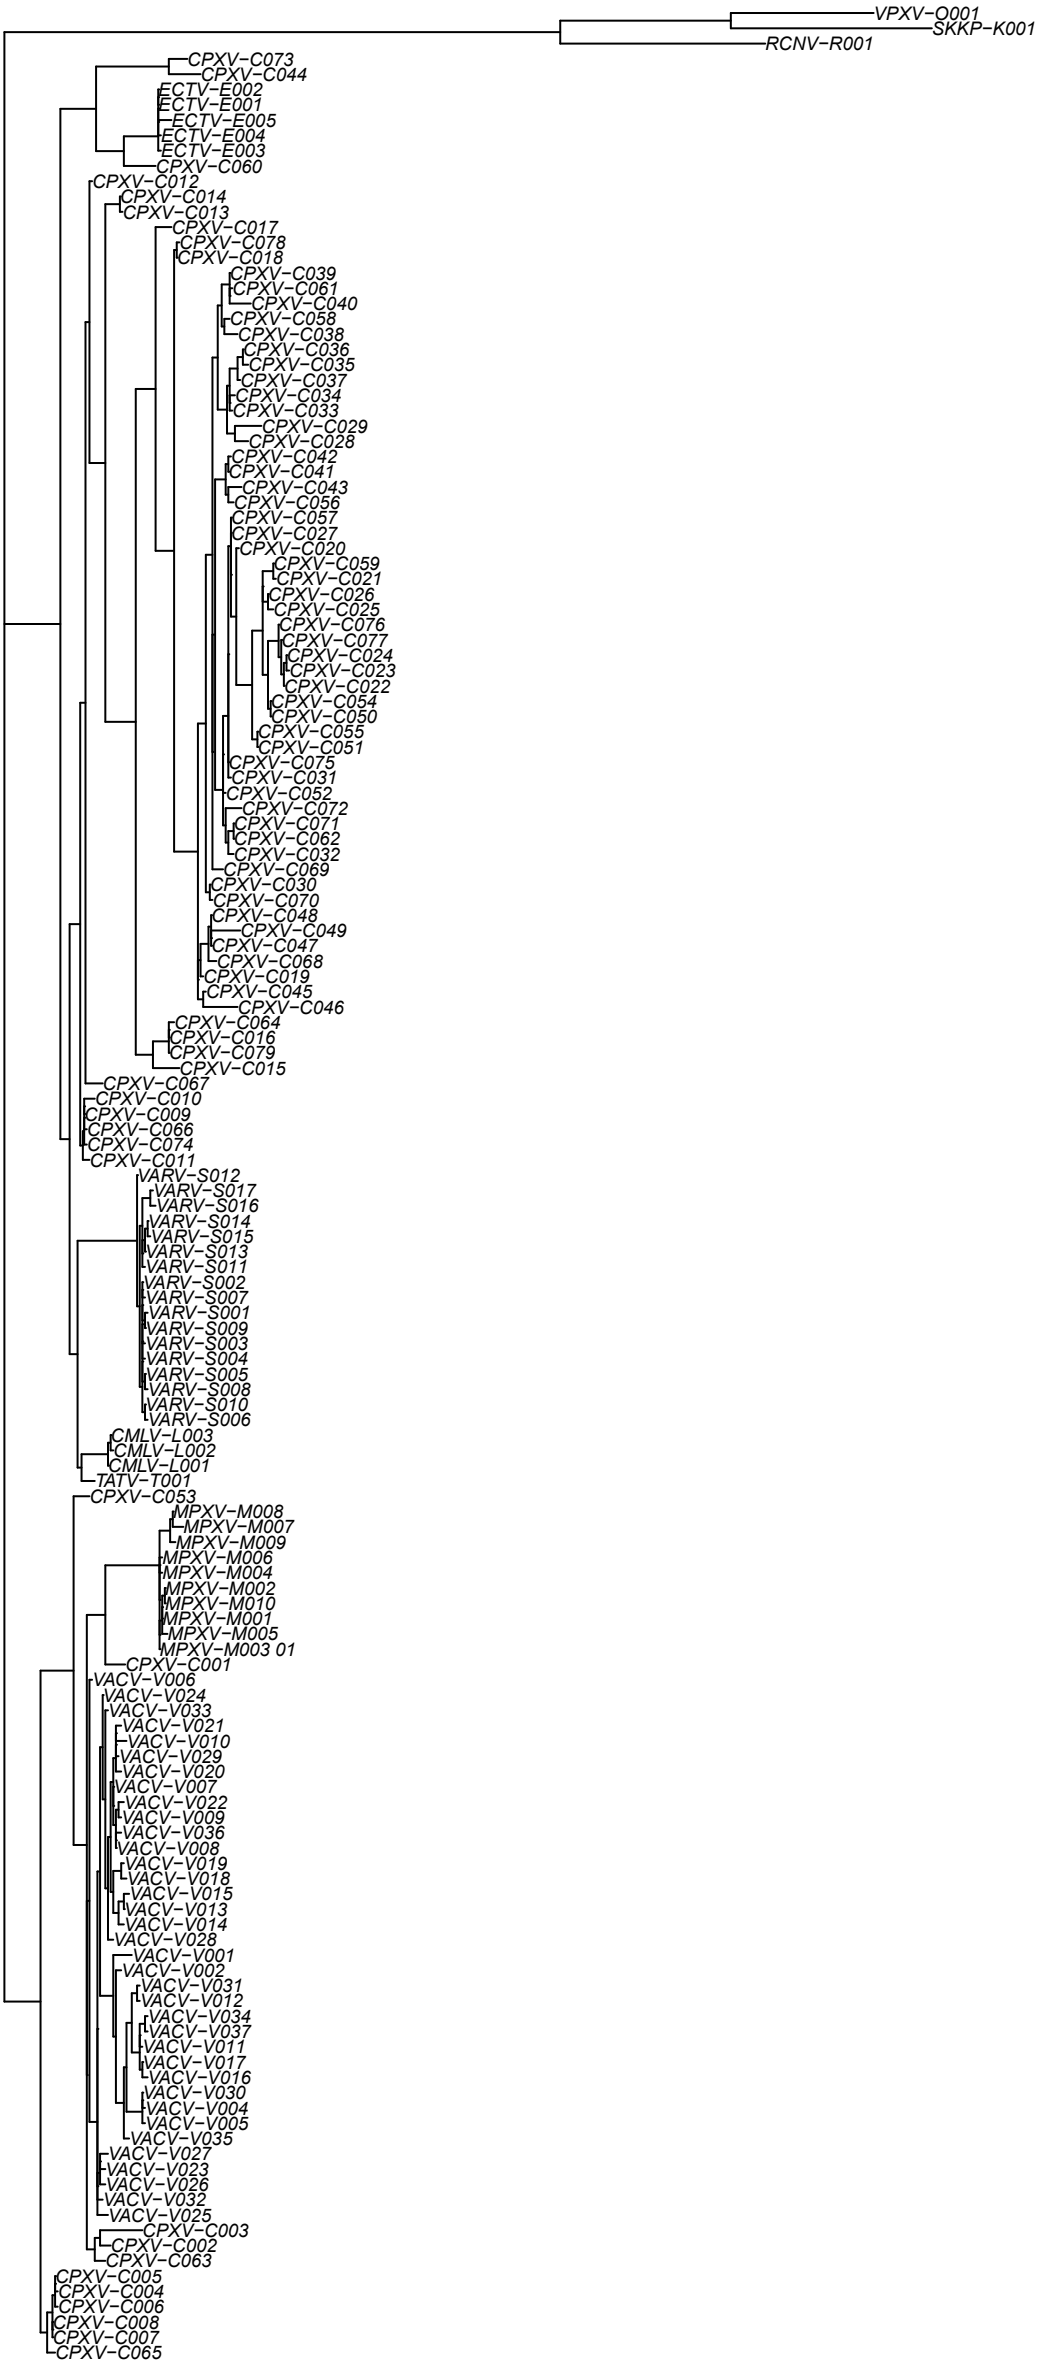

Supplement: peerj-07-6561-s002.pdf [file peerj-07-6561-s002.pdf]
